# Supplementary material
Source: publisher figshare collection journal article supplement (https://acs.figshare.com/ndownloader/files/31079055)
Supplement: Supplementary file 1 [file 31079055]

# Supporting Information

## Temperature and reaction environment influence the nature of platinum species supported on ceria

Xiansheng Li<sup>a,b</sup>, Xing Wang<sup>a,b</sup>, Ilia I. Sadykov<sup>a,c</sup>, Dennis Palagin<sup>b</sup>, Olga V. Safonova<sup>c</sup>, Junhua Li<sup>d</sup>, Arik Beck<sup>a</sup>, Frank Krumeich<sup>a</sup>, Jeroen A. van Bokhoven<sup>a,b\*</sup> and Luca Artiglia<sup>b,e\*</sup>

<sup>a</sup>Institute for Chemical and Bioengineering, Department of Chemistry and Applied Biosciences, ETH Zurich, 8093 Zurich, Switzerland

<sup>b</sup>Laboratory for Catalysis and Sustainable Chemistry, Paul Scherrer Institute, 5232 Villigen, Switzerland

<sup>c</sup>Laboratory for Operando Spectroscopy, Paul Scherrer Institute, 5232 Villigen PSI, Switzerland

<sup>d</sup>School of Environment, Tsinghua University, Beijing, 100084, China

<sup>e</sup>Laboratory of Environmental Chemistry, Paul Scherrer Institute, 5232 Villigen, Switzerland

### corresponding authors email:

(L.A.) [luca.artiglia@psi.ch](mailto:luca.artiglia@psi.ch);

(J.A.vB) [jeroen.vanbokhoven@chem.ethz.ch](mailto:jeroen.vanbokhoven@chem.ethz.ch)

## METHODS

### Catalyst preparation

1 wt % Pt/CeO<sub>2</sub> catalyst was prepared by incipient wetness impregnation. Ce(NO<sub>3</sub>)<sub>3</sub>·6H<sub>2</sub>O (99%; Sigma-Aldrich) was heated in air at 350 °C for 2 h to obtain bare ceria support. An appropriate amount of chloroplatinic acid (Alfa Aesar, 99.9%) was dissolved and the solution was added drop-wise to the ceria while grinding. The powder was then dried at 80°C for 12 h. Afterwards, the sample was directly calcined and thermally aged at 800°C for 12 h in flowing air. Such sample is designated as Pt/CeO<sub>2</sub>. Pt/CeO<sub>2</sub> (0.3 g) was loaded in a quartz tube flow reactor and steam treated by 10% H<sub>2</sub>O in Argon (70 mL/min) at 750 °C for 9 h. The sample was then cooled down to 300 °C and the water vapor was discontinued. Subsequently, the sample was purged in the same carrier gas for 1 h before cooling down to room temperature. The resulting sample is designated as Pt/CeO<sub>2\_s</sub>. Ceria was also thermally aged under the same conditions as described above, and designated as CeO<sub>2\_s</sub>. The calcination and steam treatment heating ramp was 5°C/min. N<sub>2</sub> adsorption and desorption measurements were conducted at 77 K using a Micromeritics 3 Flex automatic surface area and pore size analyzer. BET surface area of Pt/CeO<sub>2</sub>, Pt/CeO<sub>2\_s</sub> and CeO<sub>2</sub> are 17.4, 14.9 and 106.2 m<sup>2</sup>/g.

### Electron microscopy

Transmission electron microscopy (TEM) was performed using a Jeol JEM 2010 at 300 kV at the Electron Microscopy Facility (EMF) of the Paul Scherrer Institute. Scanning TEM (STEM) at 200 kV using high-angle annular dark field (HAADF) imaging was performed with a Hitachi HD 2700 electron microscope equipped with a Cs-corrector at the Scientific Center for Optical and Electron Microscopy (ScopeM) of ETH Zurich. Electron microscopy was acquired ex situ, in vacuum (10<sup>-6</sup> mbar pressure range). Fresh Pt/CeO<sub>2</sub> and Pt/CeO<sub>2\_s</sub> samples were synthesized and transferred to the TEM facility while exposed to air.

### CO oxidation performance

CO oxidation reaction was conducted in an atmospheric pressure fixed-bed quartz micro-reactor. 30 mg of catalyst, sieved to 40 to 60 mesh, were diluted with inert SiO<sub>2</sub> powder (0.3 g) to prevent temperature gradients. The concentrations of CO and CO<sub>2</sub> at the outlet were continually monitored with an FTIR spectrometer (MultiGas TM 2030 FTIR Continuous Gas Analyzer). The catalyst was pretreated with 100 sccm (standard cubic centimeter per minute)

of 10% O<sub>2</sub>/Ar at 300°C for 1h before cooling down to room temperature. For CO oxidation reaction, the reaction temperature was ramped up from 30 °C to 500 °C with a heating rate of 2 °C /min. The flow mixture was 1.15% CO, 5% O<sub>2</sub> and N<sub>2</sub> balance, total flow rate was 100 sccm, velocity was 200 000 h<sup>-1</sup>.

## FIGURES AND TABLES

**Table S1. Peak Fitting Parameters (Position and FWHM) of Pt4f Photoemission Spectra.**

| Pt species             | Position/eV | FWHM/eV | Asymmetry parameters |     |
|------------------------|-------------|---------|----------------------|-----|
|                        |             |         | TS                   | TL  |
| <b>Pt<sup>0</sup></b>  | 71.0±0.05   | 1.13    | 0.3                  | 110 |
| <b>Pt<sup>2+</sup></b> | 72.7±0.1    | 1.13    | 0                    | 1   |

**Table S2. EXAFS fitting parameters of Pt foil, Pt/CeO<sub>2</sub> and Pt/CeO<sub>2</sub>\_s.**

| Sample                      | Shell | CN       | R(Å)       | $\sigma^2$ (Å <sup>2</sup> ) | $\Delta E_0$ (eV) | $S_0^2$ |
|-----------------------------|-------|----------|------------|------------------------------|-------------------|---------|
| <b>Pt/CeO<sub>2</sub></b>   | Pt-O  | 4.1±0.7  | 2.00±0.02  | 0.0004±0.002                 | 4.8±2.2           | 0.88    |
| <b>Pt/CeO<sub>2</sub>_s</b> | Pt-O  | 2.0±1.3  | 1.92±0.03  | 0.01±0.01                    | 4.3±1.7           | 0.88    |
|                             | Pt-Pt | 10.1±2.8 | 2.68±0.02  | 0.012±0.004                  | 4.3±1.7           | 0.88    |
| <b>Pt foil</b>              | Pt-Pt | 12       | 2.76±0.005 | 0.0051±0.0005                | 6.0±0.7           | 0.88    |

CN, coordination number; R, distance between absorber and backscatter atoms;  $\sigma^2$ , Debye–Waller factor of the reference compound;  $\Delta E_0$ , inner potential correction to account for the difference in the inner potential between the sample and the reference compound. The amplitude-reduction factor  $S_0^2$  was established for the Pt foil reference and was fixed for EXAFS fitting.

**Table S3. Bader charge differences for platinum in bulk platinum oxides and atomically dispersed platinum species on ceria (223) surface.**

|                                    | Platinum species                                | Space group          | Bader charge( e ) |
|------------------------------------|-------------------------------------------------|----------------------|-------------------|
| <b>Bulk references</b>             | PtO <sub>2</sub> bulk                           | pnnm                 | 1.51              |
|                                    | PtO bulk                                        | P4 <sub>2</sub> /mmc | 0.88              |
|                                    | Pt bulk                                         | Fm $\bar{3}$ m       | 0.00              |
| <b>Molecule/cluster references</b> | PtO <sub>2</sub>                                | -                    | 1.15              |
|                                    | (PtO <sub>2</sub> ) <sub>4</sub> on ceria (111) | -                    | 1.26              |
| <b>Pt AD structures</b>            | Platinum in [Pt-4O]                             | -                    | 1.07              |
|                                    | Platinum in [Pt-4O]-Ov                          | -                    | 0.74              |

**Table S4. LCF results of XANES spectra acquired under different conditions.**

| Experiment       | Sample                | Acquisition condition   | Pt <sup>0</sup> /% | error | Pt <sup>2+</sup> /% | error | Pt <sup>4+</sup> /% | error |
|------------------|-----------------------|-------------------------|--------------------|-------|---------------------|-------|---------------------|-------|
| Steady state     | Pt/CeO <sub>2</sub>   | RT in air               | 0.0                | 9.1   | 29.5                | 11.7  | 70.5                | 7.3   |
|                  | Pt/CeO <sub>2_s</sub> | RT in air               | 63.8               | 2.4   | 16.4                | 3.1   | 19.7                | 1.9   |
| In situ steaming | Pt/CeO <sub>2</sub>   | RT in air               | 0.0                | 10.4  | 15.0                | 13.3  | 85.0                | 8.3   |
|                  |                       | 96°C                    | 0.0                | 5.8   | 20.7                | 7.4   | 79.3                | 4.5   |
|                  |                       | 201°C                   | 0.8                | 5.5   | 26.7                | 7.0   | 72.5                | 4.3   |
|                  |                       | 301°C                   | 11.2               | 6.5   | 22.8                | 8.3   | 66.1                | 5.1   |
|                  |                       | 406°C                   | 3.7                | 5.9   | 39.7                | 7.4   | 56.7                | 4.6   |
|                  |                       | 506°C                   | 0.0                | 6.2   | 48.3                | 7.8   | 51.7                | 4.8   |
|                  |                       | 611°C                   | 7.4                | 6.0   | 41.4                | 7.6   | 51.1                | 4.7   |
|                  |                       | 691°C                   | 9.2                | 4.1   | 51.0                | 5.3   | 39.7                | 3.2   |
|                  |                       | 800°C                   | 24.9               | 3.8   | 35.0                | 4.8   | 40.1                | 2.9   |
| In situ reaction | Pt/CeO <sub>2</sub>   | 300°C O <sub>2</sub>    | 0.0                | 7.1   | 49.9                | 8.9   | 50.1                | 5.5   |
|                  |                       | 220°C CO+O <sub>2</sub> | 0.0                | 6.6   | 59.3                | 8.4   | 40.7                | 5.1   |
|                  |                       | 300°C CO+O <sub>2</sub> | 0.0                | 5.2   | 67.3                | 6.5   | 32.7                | 4.0   |
|                  |                       | 400°C CO+O <sub>2</sub> | 0.0                | 4.6   | 68.2                | 5.9   | 31.8                | 3.6   |
|                  | Pt/CeO <sub>2_s</sub> | 300°C O <sub>2</sub>    | 46.2               | 3.5   | 21.1                | 4.4   | 32.7                | 2.7   |
|                  |                       | 100°C CO+O <sub>2</sub> | 32.8               | 2.8   | 64.2                | 3.5   | 3.0                 | 2.2   |
|                  |                       | 150°C CO+O <sub>2</sub> | 38.5               | 1.8   | 45.0                | 2.2   | 16.6                | 1.4   |
|                  |                       | 200°C CO+O <sub>2</sub> | 29.4               | 2.6   | 61.5                | 3.3   | 9.1                 | 2.0   |

**Table S5. Comparison of results using different methods for platinum speciation quantification.**

| Sample                                | Pt <sup>0</sup> /% | error | Pt <sup>2+</sup> /% | error | Pt <sup>4+</sup> /% | error |
|---------------------------------------|--------------------|-------|---------------------|-------|---------------------|-------|
| Pt/CeO <sub>2</sub> (-20 to +40 eV)   | 0.0                | 11.0  | 22.8                | 16.1  | 77.2                | 19.5  |
| Pt/CeO <sub>2_s</sub> (-20 to +40 eV) | 63.2               | 2.4   | 17.2                | 3.6   | 19.5                | 4.7   |
| Pt/CeO <sub>2</sub> (-10 to +90 eV)   | 0.0                | 9.1   | 29.5                | 11.7  | 70.5                | 7.3   |
| Pt/CeO <sub>2_s</sub> (-10 to +90 eV) | 63.8               | 2.4   | 16.4                | 3.1   | 19.7                | 1.9   |

**Table S6. Proportion of platinum species on Pt/CeO<sub>2</sub> and Pt/CeO<sub>2\_s</sub> in the reaction gas of CO + O<sub>2</sub> at different temperatures during in situ XPS measurement.**

|                             | <b>Reaction<br/>temperature/°C</b> | <b>Pt<sup>0</sup><br/>proportion/%</b> | <b>Pt<sup>2+</sup><br/>proportion/%</b> |
|-----------------------------|------------------------------------|----------------------------------------|-----------------------------------------|
| <b>Pt/CeO<sub>2</sub></b>   | 220                                | 0                                      | 100                                     |
|                             | 300                                | 0                                      | 100                                     |
|                             | 400                                | 0                                      | 100                                     |
| <b>Pt/CeO<sub>2_s</sub></b> | 100                                | 94                                     | 6                                       |
|                             | 150                                | 93                                     | 7                                       |
|                             | 200                                | 90                                     | 10                                      |

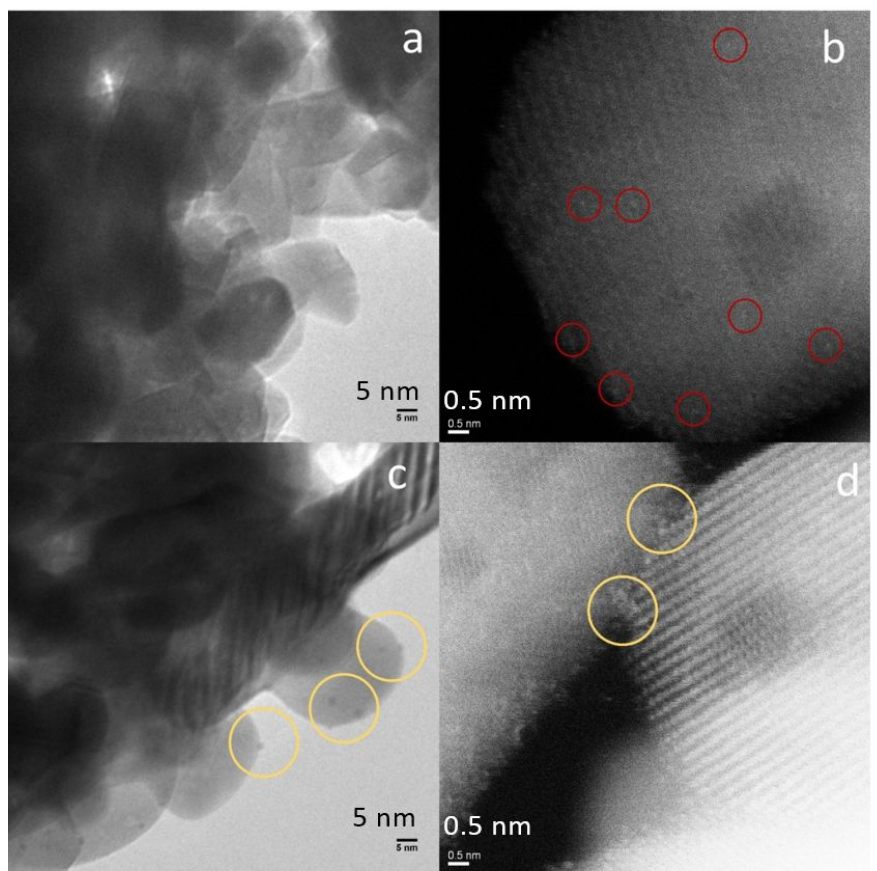

**Figure S1. Transmission electron microscope (TEM) morphologies of the Pt/CeO<sub>2</sub>(a)(b) and Pt/CeO<sub>2</sub>\_s(c)(d).** (a)(c) were acquired by a high resolution transmission electron microscopy. (b)(d) were implemented by high-angle annular dark field mode scanning transmission electron microscopy (HAADF-STEM). Platinum nanoparticles have been marked in the yellow circles in (c)(d) and atomically dispersed platinum atoms are in red circles in (b).

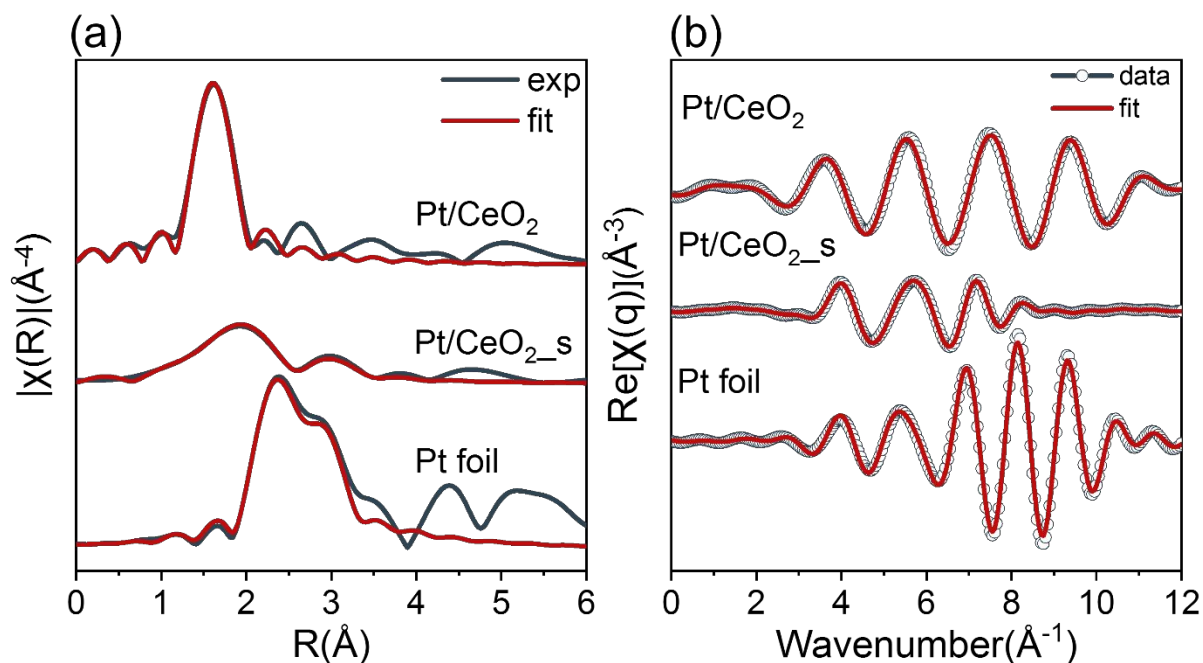

**Figure S2. (a) The  $k^3$ -weighted Fourier transform from EXAFS spectra and (b) EXAFS spectra in  $q$ -space of Pt  $L_3$  edge for Pt/CeO<sub>2</sub>, Pt/CeO<sub>2\_s</sub>, Pt foil and PtO<sub>2</sub>. Fits were performed over an  $R$  range of 1.25–3.4  $\text{\AA}$  for Pt foil in  $k$  range 3–10  $\text{\AA}^{-1}$ ,  $R$  range of 1.15–4  $\text{\AA}$  for Pt/CeO<sub>2\_s</sub> in  $k$  range 3–8  $\text{\AA}^{-1}$ ,  $R$  range of 1.3–2.6  $\text{\AA}$  for Pt/CeO<sub>2</sub> in  $k$  range 3–10.5  $\text{\AA}^{-1}$ . The peaks in the first shell of Pt/CeO<sub>2</sub> and Pt/CeO<sub>2\_s</sub> are fitted to the Pt–O contribution, and the peaks in the second shell of Pt/CeO<sub>2\_s</sub> are fitted to the Pt–Pt coordination. The Pt–O path calculated by atomically dispersed [Pt-4O]/CeO<sub>2</sub>(223) model was used to fit the Pt–O contribution in Pt/CeO<sub>2</sub>.**



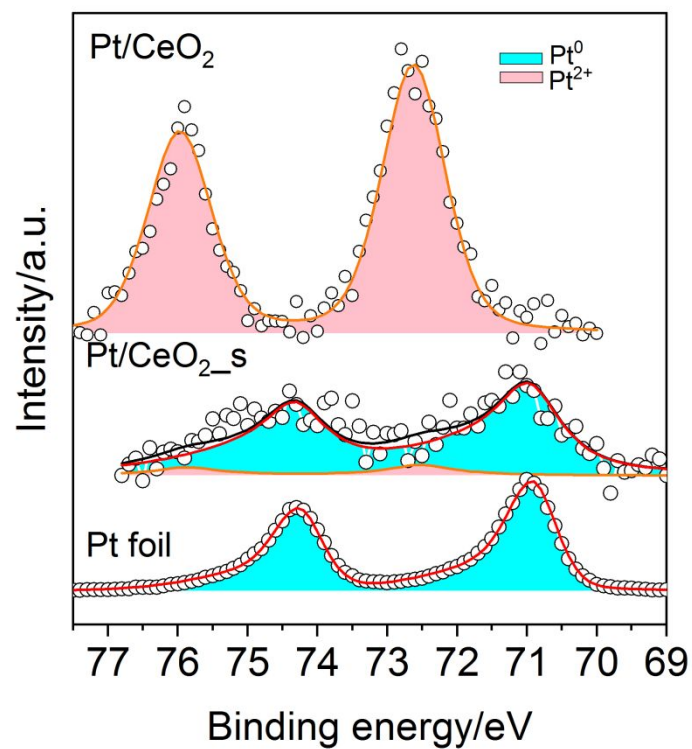

**Figure S3. Deconvolution of Pt 4f XPS profile for Pt/CeO<sub>2</sub>, Pt/CeO<sub>2\_s</sub> and Pt foil.** The spectra of Pt/CeO<sub>2</sub> and Pt/CeO<sub>2\_s</sub> were acquired during activation in 1mbar O<sub>2</sub> at 300°C. Spectra of Pt foil were acquired under high vacuum. The Doniach-Sunjic asymmetric parameters for fitting of Pt/CeO<sub>2\_s</sub> were obtained from the fitting of Pt foil spectra. Pt/CeO<sub>2</sub> was used as a reference of Pt<sup>2+</sup>.

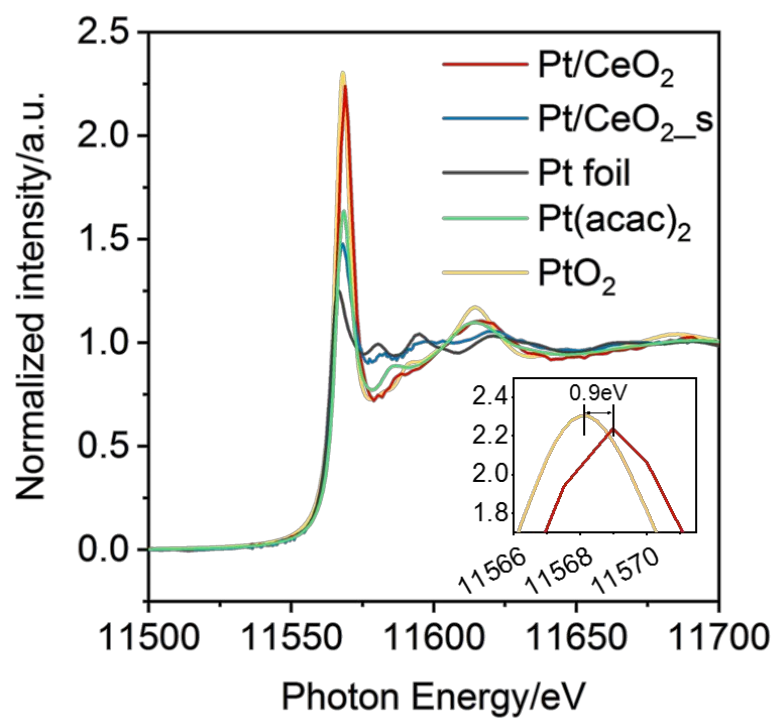

**Figure S4.** The normalized Pt L<sub>3</sub> edge XANES spectra of Pt/CeO<sub>2</sub>, Pt/CeO<sub>2\_s</sub>, PtO<sub>2</sub>, Pt(acac)<sub>2</sub> and Pt foil. All the spectra were collected in air at room temperature. There is 0.9eV energy shift between Pt/CeO<sub>2</sub> and PtO<sub>2</sub>.

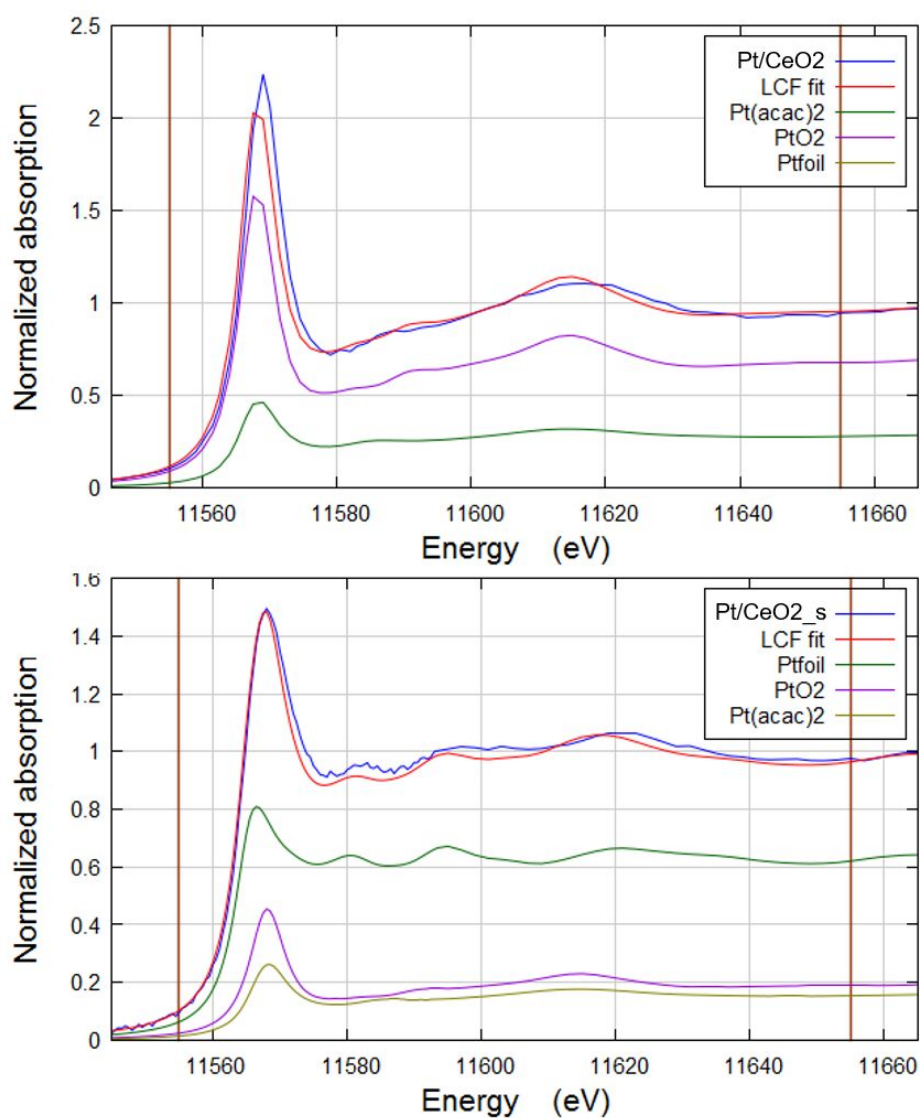

**Figure S5. XANES Linear combination fitting details of Pt/CeO<sub>2</sub> and Pt/CeO<sub>2\_s</sub>.** The reference spectra for LCF are acquired from Pt foil, Pt(acac)<sub>2</sub> and PtO<sub>2</sub>. The energy range for fitting is 11555.8 eV – 11655.8 eV. All weights are constrained between 0 and 1, and weights are forced to sum to 1.

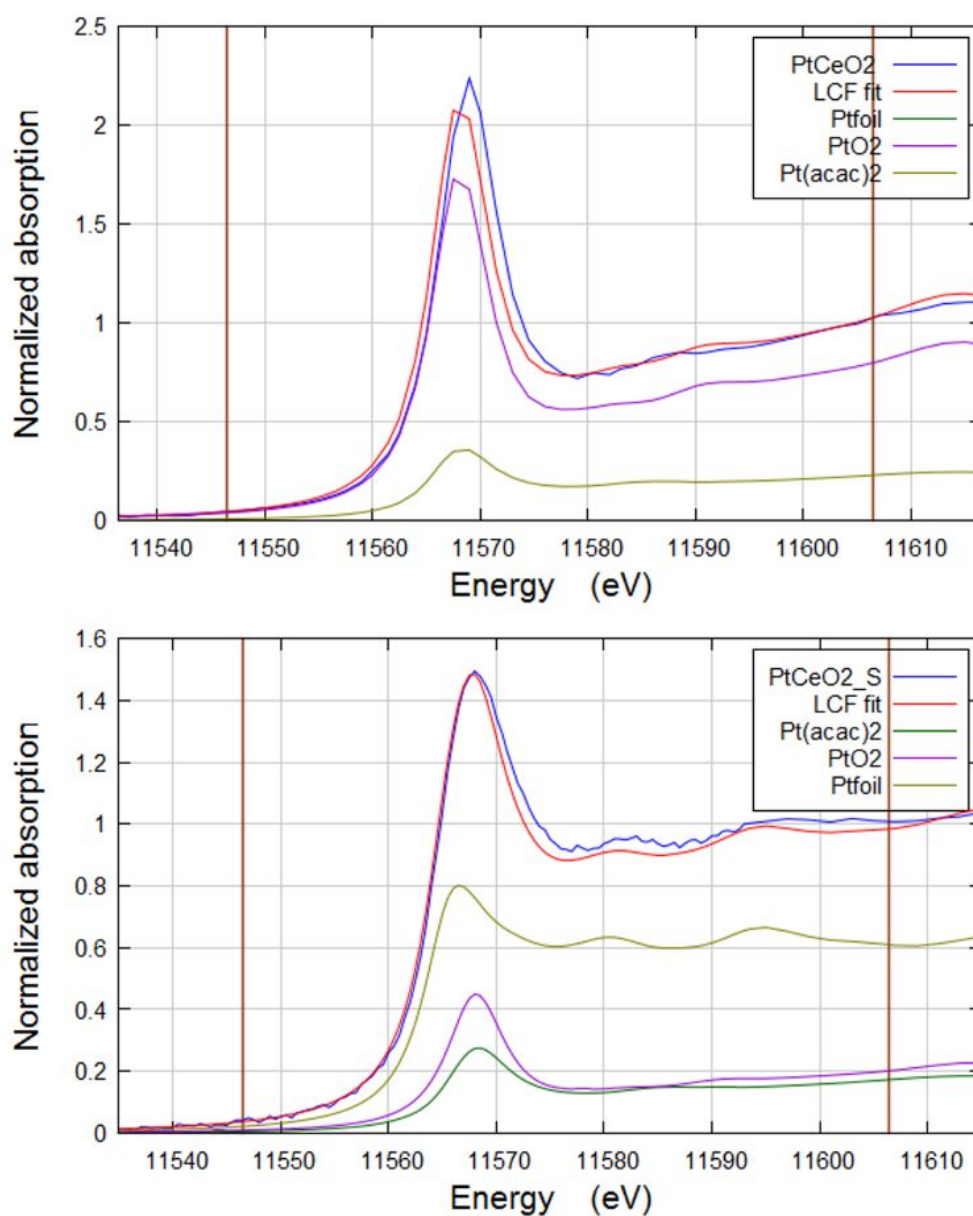

**Figure S6. XANES Linear combination fitting details of Pt/CeO<sub>2</sub> and Pt/CeO<sub>2</sub>\_s.** The reference spectra for LCF are acquired from Pt foil, Pt(acac)<sub>2</sub> and PtO<sub>2</sub>. The energy range for fitting is -20 to 40 eV. All weights are constrained between 0 and 1, and weights are forced to sum to 1.

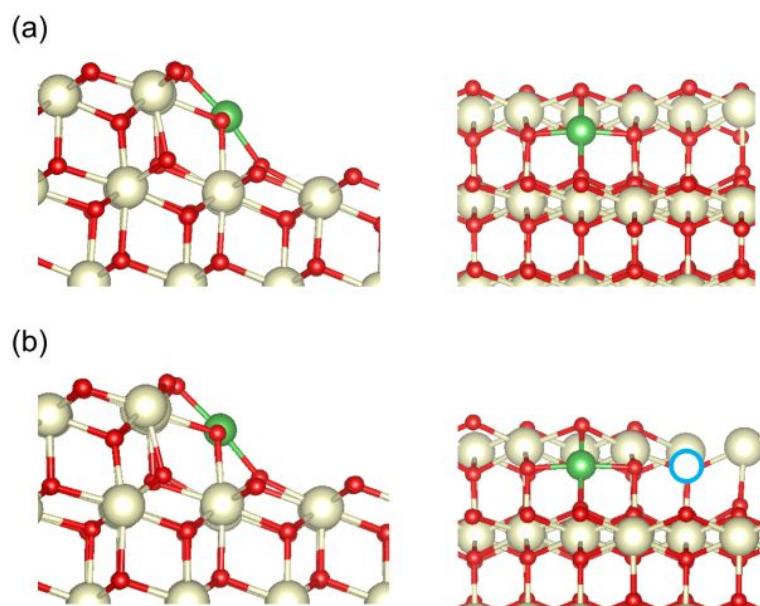

**Figure S7. The most stable geometry of atomically dispersed platinum species on CeO<sub>2</sub> (223) surface in side and top views. (a) Pt<sup>IV</sup>O<sub>2</sub>, (b) Pt<sup>II</sup>O. Green spheres: Pt atoms, gray spheres: Ce atoms, red spheres: O atoms, and the blue circle represent an oxygen vacancy.**

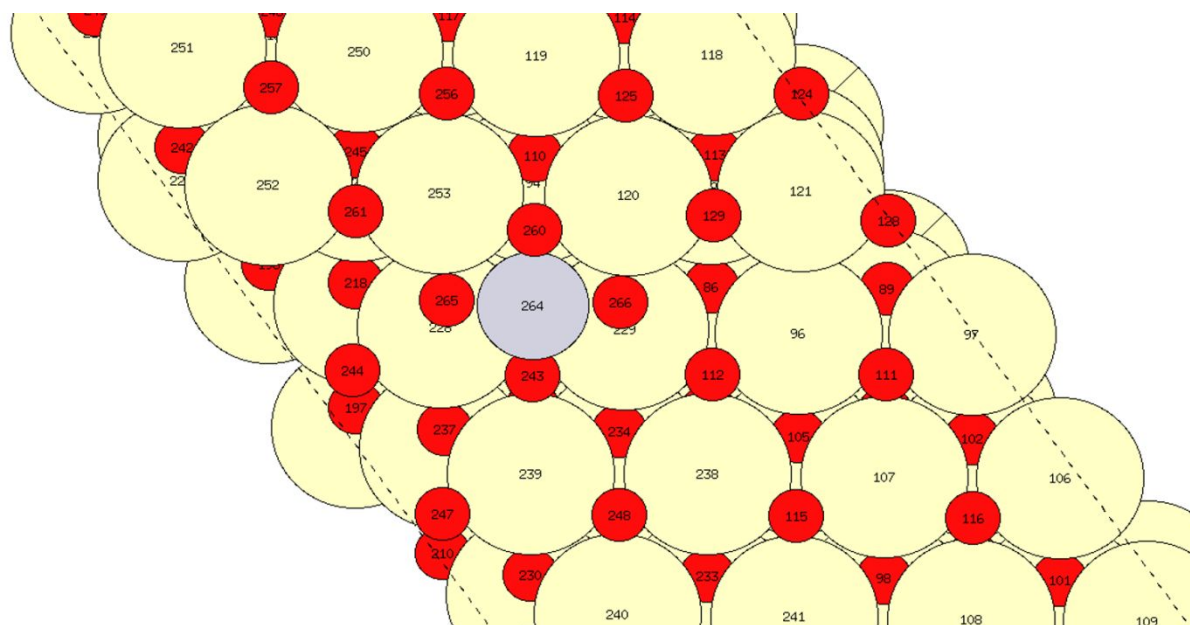

Relative stability of [Pt-4O]  
with one oxygen vacancy

| Ov index | Relative<br>stability<br>(eV) | Bader<br>charge |
|----------|-------------------------------|-----------------|
| O-129    | 0.00                          | 0.74            |
| O-112    | +1.06                         | 0.75            |
| O-128    | +0.44                         | 0.76            |
| O-115    | +1.44                         | 0.76            |
| O-111    | +1.58                         | 0.76            |
| O-247    | +1.28                         | 0.76            |
| O-244    | +1.07                         | 0.76            |

Relative stability of [Pt-4O]  
with two oxygen vacancies

| Ov index | Relative<br>stability<br>(eV) | Bader<br>charge |
|----------|-------------------------------|-----------------|
| 265-266  | +1.87                         | -0.03           |
| 129-243  | +3.41                         | -0.05           |
| 129-260  | +3.14                         | 0.005           |
| 129-265  | +2.56                         | 0.027           |
| 129-266  | +3.13                         | 0.029           |

**Figure S8. Structures and relative stability of [Pt-4O] with one and two oxygen vacancies in different locations on ceria 223 face.**

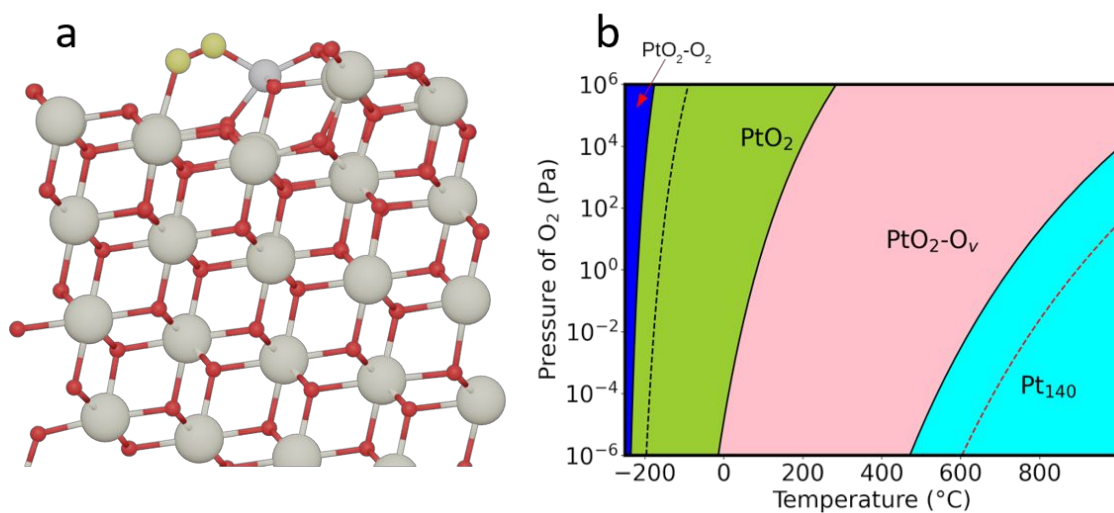

**Figure S9. (a) Optimized structure for adsorbed O<sub>2</sub> on [Pt<sup>IV</sup>O<sub>2</sub>] and (b) Phase diagram of platinum species as a function of temperature and pressure of O<sub>2</sub>.** Black dashed line is plotted using the adsorption energy reported in the paper (ACS Catalysis, 2021, 11, 8701-8715). Red dashed line is the equilibrium line between the atomically dispersed Pt<sup>0</sup> species and PtO<sub>2</sub>-O<sub>v</sub> species.

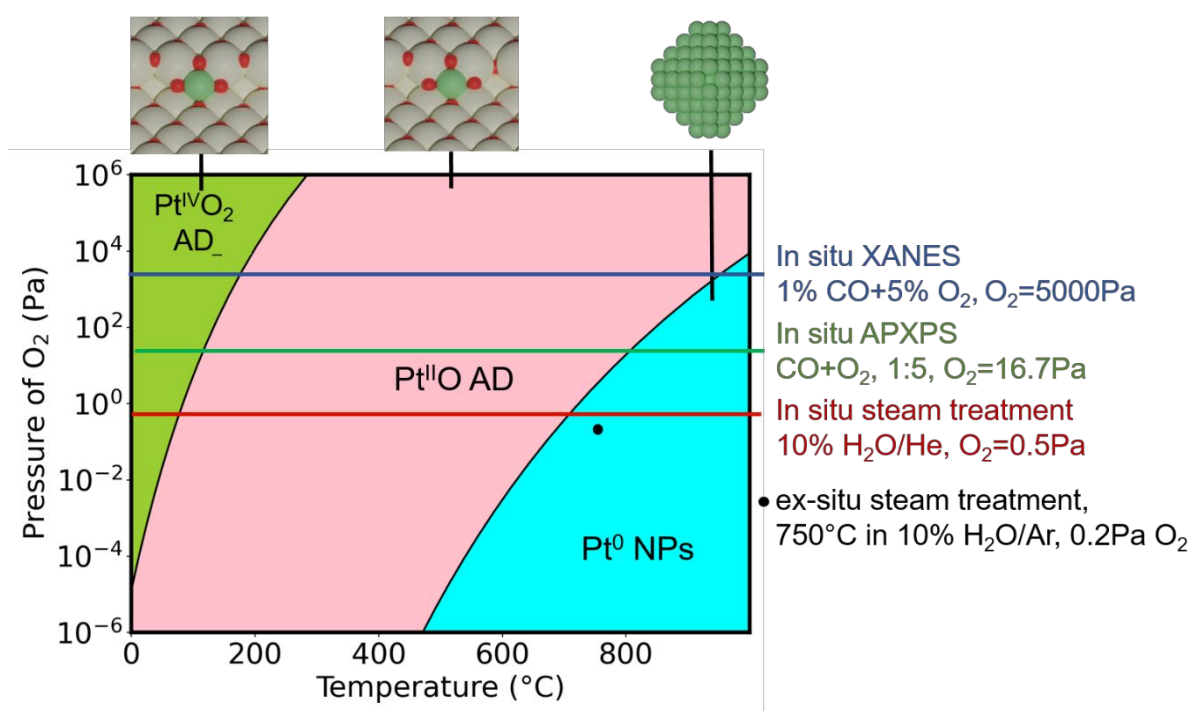

**Figure S10.** In situ experiments, i.e. in situ XAS, in situ XPS and in situ steam treatment conditions labeled in the phase diagram.



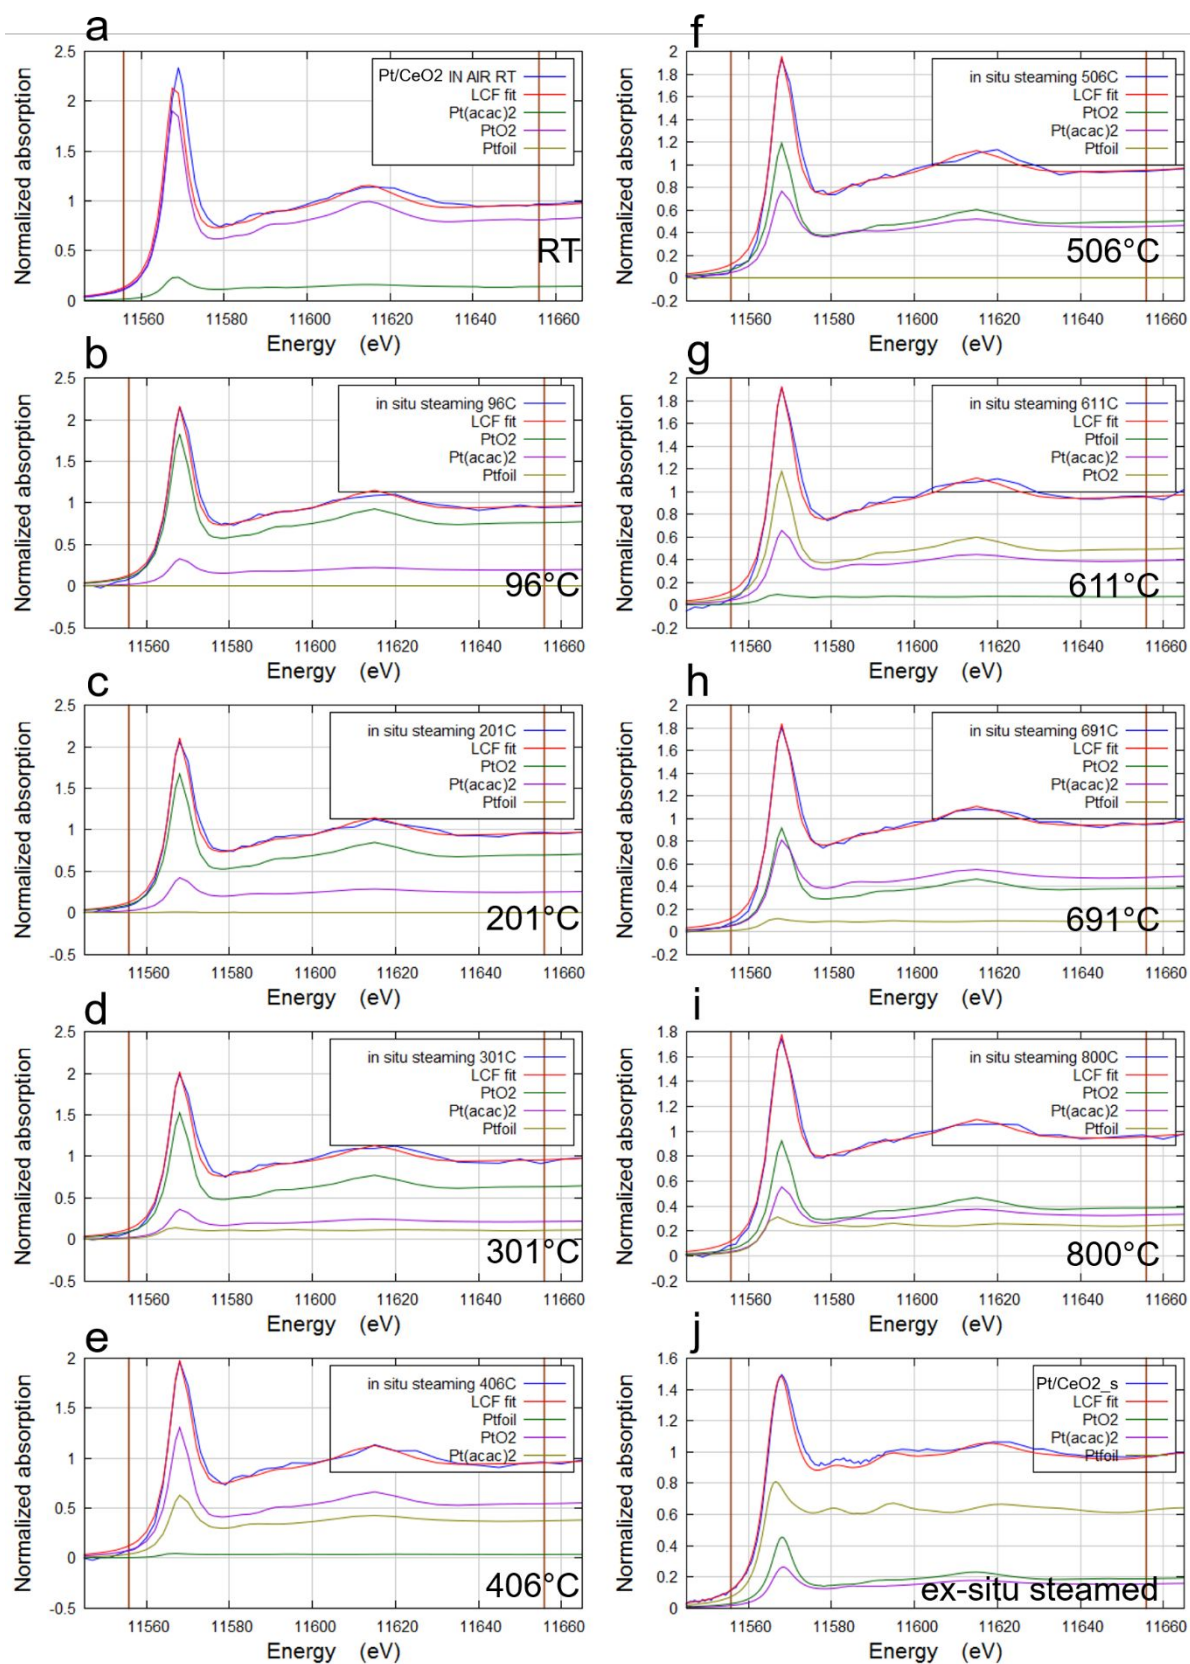

**Figure S11. Linear combination fitting details of XANES spectra acquired during in situ steam treatment.** Raw and LCF XANES spectra during ramp up: (a) room temperature; (b) 96°C; (c)

201°C; (d) 301°C; (e) 406°C; (f) 506°C; (g) 611°C; (h) 691°C; (i) 800°C and (j) after ex situ steam treatment. The reference spectra for LCF are acquired from Pt foil, Pt(acac)<sub>2</sub> and PtO<sub>2</sub>. The energy range for fitting is 11555.8 eV – 11655.8 eV. All weights are constrained between 0 and 1, and weights are forced to sum to 1.

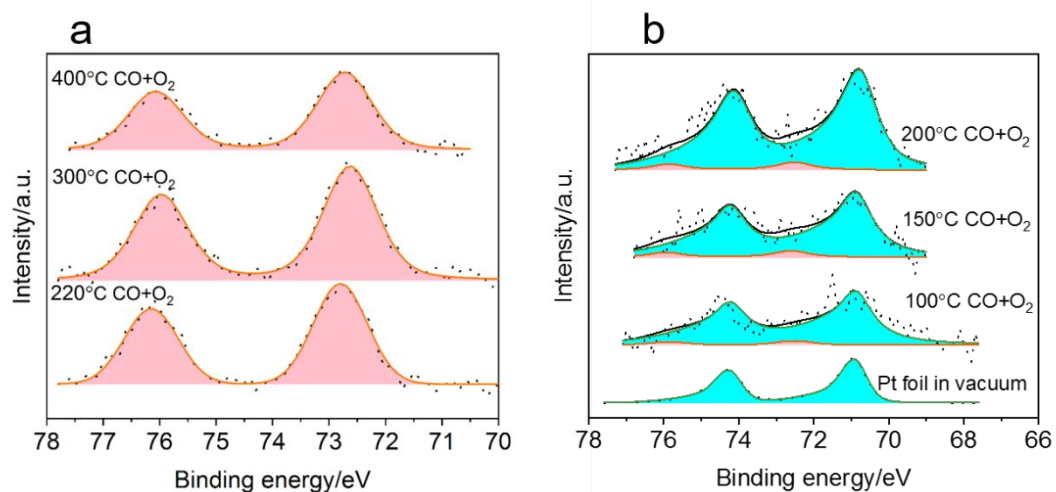

**Figure S12. Deconvolution of Pt 4f XPS profile for Pt/CeO<sub>2</sub> (a) and Pt/CeO<sub>2\_s</sub> (b) during in situ reaction.**

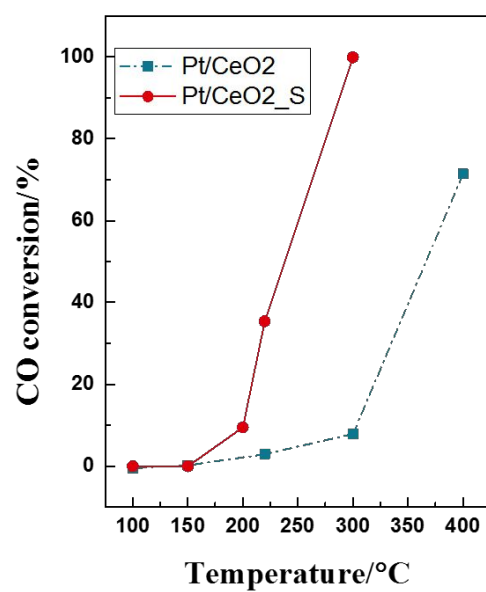

**Figure S13.** CO oxidation conversion of Pt/CeO<sub>2</sub> and Pt/CeO<sub>2</sub>\_s under the same conditions during in situ XANES experiments.
